# Supplementary material for: Bi-modal Distribution of the Second Messenger c-di-GMP Controls Cell Fate and Asymmetry during the Caulobacter Cell Cycle
Source: PubMed Central journal article supplement (PMC3764195; doi:10.1371/journal.pgen.1003744), 2013-09-05
Supplement: pgen.1003744.s012.pdf [file pgen.1003744.s012.pdf]

| <i>Caulobacter crescentus</i> strains: |                        |                                                                                                  |                                     |
|----------------------------------------|------------------------|--------------------------------------------------------------------------------------------------|-------------------------------------|
| Name                                   | Genotype               | Description                                                                                      | Source or Reference                 |
| CB15                                   | CB15                   | <i>C. crescentus</i> wild type ATCC 19089 <i>Caulobacter vibrioides</i> LOT: 3967454             | (Poindexter and Cohen-Bazire, 1964) |
| NA1000                                 | CB15N                  | Laboratory strain derived from CB15                                                              | (Evinger and Agabian, 1977)         |
| SoA0071                                | CB15 $\Delta popA$     | markerless in frame deletion of <i>popA</i> in CB15 by allelic exchange using plasmid pAD8       | this study                          |
| SoA0144                                | NA1000 $\Delta cc0655$ | markerless in frame deletion of <i>cc0655</i> in NA1000 by allelic exchange using plasmid pSA93  | this study                          |
| SoA0145                                | NA1000 $\Delta tipF$   | markerless in frame deletion of <i>tipF</i> in NA1000 by allelic exchange using plasmid pSA94    | this study                          |
| SoA0154                                | NA1000 $\Delta cc0740$ | markerless in frame deletion of <i>cc0740</i> in NA1000 by allelic exchange using plasmid pAD2   | this study                          |
| SoA0155                                | NA1000 $\Delta cc0857$ | markerless in frame deletion of <i>cc0857</i> in NA1000 by allelic exchange using plasmid pSA91  | this study                          |
| SoA0156                                | NA1000 $\Delta cc0896$ | markerless in frame deletion of <i>cc0896</i> in NA1000 by allelic exchange using plasmid pSA102 | this study                          |
| SoA0157                                | NA1000 $\Delta cc1086$ | markerless in frame deletion of <i>cc1086</i> in NA1000 by allelic exchange using plasmid pSA79  | this study                          |
| SoA0161                                | NA1000 $\Delta cc3094$ | markerless in frame deletion of <i>cc3094</i> in NA1000 by allelic exchange using plasmid pSA96  | this study                          |
| SoA0162                                | NA1000 $\Delta cc3148$ | markerless in frame deletion of <i>cc3148</i> in NA1000 by allelic exchange using plasmid pSA90  | this study                          |
| SoA0163                                | NA1000 $\Delta dgcA$   | markerless in frame deletion of <i>dgcA</i> in NA1000 by allelic exchange using plasmid pSA80    | this study                          |
| SoA0166                                | CB15 $\Delta cc0655$   | markerless in frame deletion of <i>cc0655</i> in CB15 by allelic exchange using plasmid pSA93    | this study                          |
| SoA0167                                | CB15 $\Delta tipF$     | markerless in frame deletion of <i>tipF</i> in CB15 by allelic exchange using plasmid pSA94      | this study                          |
| SoA0168                                | CB15 $\Delta cc0740$   | markerless in frame deletion of <i>cc0740</i> in CB15 by allelic exchange using plasmid pAD2     | this study                          |
| SoA0170                                | CB15 $\Delta cc0896$   | markerless in frame deletion of <i>cc896</i> in CB15 by allelic exchange using plasmid pSA102    | this study                          |
| SoA0171                                | CB15 $\Delta cc1086$   | markerless in frame deletion of <i>cc1086</i> in CB15 by allelic exchange using plasmid pSA79    | this study                          |
| SoA0173                                | CB15 $\Delta dgcB$     | markerless in frame deletion of <i>dgcB</i> in CB15 by allelic exchange using plasmid pAD7       | (Abel et al., 2011)                 |
| SoA0175                                | CB15 $\Delta cc3094$   | markerless in frame deletion of <i>cc3094</i> in CB15 by allelic exchange using plasmid pSA96    | this study                          |

|         |                                                                                                                                                                          |                                                                                                                                                                                                                                                                  |            |
|---------|--------------------------------------------------------------------------------------------------------------------------------------------------------------------------|------------------------------------------------------------------------------------------------------------------------------------------------------------------------------------------------------------------------------------------------------------------|------------|
| SoA0176 | CB15 $\Delta cc3148$                                                                                                                                                     | markerless in frame deletion of <i>cc3148</i> in CB15 by allelic exchange using plasmid pSA90                                                                                                                                                                    | this study |
| SoA0177 | CB15 $\Delta dgcA$                                                                                                                                                       | markerless in frame deletion of <i>dgcA</i> in CB15 by allelic exchange using plasmid pSA80                                                                                                                                                                      | this study |
| SoA0739 | NA1000 pSA129                                                                                                                                                            | NA1000 containing pSA129                                                                                                                                                                                                                                         | this study |
| SoA0741 | CB15 pSA129                                                                                                                                                              | CB15 containing pSA129                                                                                                                                                                                                                                           | this study |
| SoA0764 | NA1000 $\Delta dgcB \Delta cc0857 \Delta cc0740 \Delta dgcA \Delta pleD \Delta cc0655 \Delta cc3094 \Delta cc0896 \Delta cc1086 \Delta cc0091 \Delta pdeA \Delta cc3148$ | markerless in frame deletion of <i>cc1086</i> , <i>cc0091</i> , <i>pdeA</i> and <i>cc3148</i> in NA1000 $cdG^0$ background by allelic exchange using plasmids pSA79, pSA156, pSA81, and pSA90, respectively; referred to as $rcdG^0$ strain in NA1000 background | this study |
| SoA0801 | NA1000 pSRK-Km                                                                                                                                                           | NA1000 containing pSRK-Km                                                                                                                                                                                                                                        | this study |
| SoA0803 | CB15 pSRK-Km                                                                                                                                                             | CB15 containing pSRK-Km                                                                                                                                                                                                                                          | this study |
| SoA0827 | CB15 $cdG^0 dgcB^+$                                                                                                                                                      | the c-di-GMP free strain in CB15 background containing a chromosomal <i>dgcB</i> copy in the <i>dgcB</i> locus which was introduced by general transduction using $\phi CR30$ and the marker CMS21 (West et al 2002).                                            | this study |
| SoA0918 | NA1000 $\Delta cc0091$                                                                                                                                                   | markerless in frame deletion of <i>cc0091</i> in NA1000 by allelic exchange using plasmid pSA156                                                                                                                                                                 | this study |
| SoA0930 | CB15 $\Delta cc0091$                                                                                                                                                     | markerless in frame deletion of <i>cc0091</i> in CB15 by allelic exchange using plasmid pSA156                                                                                                                                                                   | this study |
| SoA1015 | CB15 $\Delta pleD$ pSA164                                                                                                                                                | CB15 $\Delta pleD$ containing pSA164                                                                                                                                                                                                                             | this study |
| SoA1061 | CB15 $\Delta pleD$ pSA129                                                                                                                                                | CB15 $\Delta pleD$ containing pSA129                                                                                                                                                                                                                             | this study |
| SoA1154 | NA1000 $cdG^0$ pSA129                                                                                                                                                    | the c-di-GMP free strain in NA1000 background containing pSA129                                                                                                                                                                                                  | this study |
| SoA1273 | NA1000 $\Delta dgcB \Delta cc0857 \Delta cc0740 \Delta dgcA \Delta cc0655 \Delta cc3094 \Delta cc0896 \Delta cc1086 \Delta cc0091 \Delta pdeA \Delta cc3148$             | $rcdG^0$ strain lacking the final markerless in frame deletion of <i>pleD</i> ; referred to as $rcdG^0::pleD$                                                                                                                                                    | this study |
| SoA1372 | NA1000 $cdG^0$ pSRK-Km                                                                                                                                                   | the c-di-GMP free strain in NA1000 background containing pSRK-Km                                                                                                                                                                                                 | this study |
| SoA1374 | NA1000 $cdG^0::ydeH$ pSRK-Km                                                                                                                                             | the c-di-GMP free strain in NA1000 background containing a chromosomal copy of YdeH integrated by allelic exchange using plasmid pSA223 and pSRK-Km                                                                                                              | this study |
| SoA1481 | CB15 $cdG^0$ pTB4                                                                                                                                                        | the c-di-GMP free strain in CB15 background containing pTB4                                                                                                                                                                                                      | this study |
| SoA1496 | NA1000 $cdG^0$ pSA280                                                                                                                                                    | the c-di-GMP free strain in NA1000 background containing pSA280                                                                                                                                                                                                  | this study |
| SoA1498 | CB15 $cdG^0$ pSA280                                                                                                                                                      | the c-di-GMP free strain in CB15 background containing pSA280                                                                                                                                                                                                    | this study |
| SoA1507 | CB15 $cdG^0$ pSA129                                                                                                                                                      | the c-di-GMP free strain in CB15 background containing pSA129                                                                                                                                                                                                    | this study |
| SoA1508 | CB15 $cdG^0$ pSRK-Km                                                                                                                                                     | the c-di-GMP free strain in CB15 background containing pSRK-Km                                                                                                                                                                                                   | this study |

|         |                                                                                                                                                                                                     |                                                                                                                                                                     |                      |
|---------|-----------------------------------------------------------------------------------------------------------------------------------------------------------------------------------------------------|---------------------------------------------------------------------------------------------------------------------------------------------------------------------|----------------------|
| SoA1511 | CB15 <i>cdG<sup>0</sup>::ydeH</i> pSRK-Km                                                                                                                                                           | the c-di-GMP free strain in CB15 background containing a chromosomal copy of YdeH integrated by allelic exchange using plasmid pSA223 and pSRK-Km                   | this study           |
| SoA1538 | NA1000 ΔMGE                                                                                                                                                                                         | FC766; NA1000 with a deletion of the mobile genetic element between position 473069-499098 of the NA1000 genome                                                     | (Marks et al., 2002) |
| SoA1539 | NA1000 ΔMGE pTB4                                                                                                                                                                                    | NA1000 ΔMGE containing pTB4                                                                                                                                         | this study           |
| SoA1541 | NA1000 ΔMGE pSRK-Km                                                                                                                                                                                 | NA1000 ΔMGE containing pSRK-Km                                                                                                                                      | this study           |
| SoA1569 | CB15 Δ <i>cc0857</i>                                                                                                                                                                                | markerless in frame deletion of <i>cc0857</i> in CB15 by allelic exchange using plasmid pSA91                                                                       | this study           |
| SoA1587 | <i>rcdG<sup>0</sup>::ydeH</i>                                                                                                                                                                       | chromosomal integration of <i>ydeH</i> in <i>rcdG<sup>0</sup></i> by allelic exchange using pSA223                                                                  | this study           |
| SoA1612 | NA1000 <i>hfsA<sup>+</sup></i> pSRK-Km                                                                                                                                                              | markerless exchange of <i>hfsA</i> <sub>NA1000</sub> to functional <i>hfsA</i> by allelic exchange using pSA178 in NA1000 containing pSRK-Km                        | this study           |
| SoA1615 | NA1000 <i>hfsA<sup>+</sup></i> ΔMGE pSRK-Km                                                                                                                                                         | markerless exchange of <i>hfsA</i> <sub>NA1000</sub> to functional <i>hfsA</i> by allelic exchange using pSA178 in NA1000 ΔMGE containing pSRK-Km                   | this study           |
| SoA1616 | NA1000 <i>cdG<sup>0</sup> hfsA<sup>+</sup></i> pSRK-Km                                                                                                                                              | markerless exchange of <i>hfsA</i> <sub>NA1000</sub> to functional <i>hfsA</i> by allelic exchange using pSA178 in NA1000 <i>cdG<sup>0</sup></i> containing pSRK-Km | this study           |
| SoA1617 | NA1000 <i>hfsA<sup>+</sup></i> pTB4                                                                                                                                                                 | markerless exchange of <i>hfsA</i> <sub>NA1000</sub> to functional <i>hfsA</i> by allelic exchange using pSA178 in NA1000 containing pTB4                           | this study           |
| SoA1620 | NA1000 <i>hfsA<sup>+</sup></i> ΔMGE pTB4                                                                                                                                                            | markerless exchange of <i>hfsA</i> <sub>NA1000</sub> to functional <i>hfsA</i> by allelic exchange using pSA178 in NA1000 ΔMGE containing pTB4                      | this study           |
| SoA1621 | NA1000 <i>cdG<sup>0</sup> hfsA<sup>+</sup></i> pTB4                                                                                                                                                 | markerless exchange of <i>hfsA</i> <sub>NA1000</sub> to functional <i>hfsA</i> by allelic exchange using pSA178 in NA1000 <i>cdG<sup>0</sup></i> containing pTB4    | this study           |
| SoA1624 | NA1000 pSA266                                                                                                                                                                                       | NA1000 containing pSA266                                                                                                                                            | this study           |
| SoA1626 | NA1000::CMS0                                                                                                                                                                                        | NA1000 containing a kanamycin resistance marker (CMS0) integrated via plasmid pLW132 linked to <i>cc0091</i>                                                        | (West et al., 2002)  |
| SoA1627 | <i>rcdG<sup>0</sup>::ydeH</i> ::CMS0                                                                                                                                                                | marker CMS0 transferred in <i>rcdG<sup>0</sup>::ydeH</i> by general transduction using φCR30, the strain retained the <i>cc0091</i> deletion                        | this study           |
| SoA1628 | NA1000:: <i>ydeH</i> ::CMS0 Δ <i>dgcb</i> Δ <i>cc0857</i> Δ <i>cc0740</i> Δ <i>dgca</i> Δ <i>pleD</i> Δ <i>cc0655</i> Δ <i>cc3094</i> Δ <i>cc0896</i> Δ <i>cc1086</i> Δ <i>pdeA</i> Δ <i>cc3148</i> | marker CMS0 transferred in <i>rcdG<sup>0</sup>::ydeH</i> by general transduction using φCR30, the strain obtained a wild-type <i>cc0091</i> allele                  | this study           |
| SoA1632 | NA1000::CMS12                                                                                                                                                                                       | NA1000 containing a kanamycin resistance marker (CMS12) integrated via plasmid pLW92 linked to <i>cc1086</i>                                                        | (West et al., 2002)  |
| SoA1633 | <i>rcdG<sup>0</sup>::ydeH</i> ::CMS12                                                                                                                                                               | marker CMS12 transferred in <i>rcdG<sup>0</sup>::ydeH</i> by general transduction using φCR30, the strain retained the <i>cc1086</i> deletion                       | this study           |

|         |                                                                                                                                                        |                                                                                                                                                         |                       |
|---------|--------------------------------------------------------------------------------------------------------------------------------------------------------|---------------------------------------------------------------------------------------------------------------------------------------------------------|-----------------------|
| SoA1634 | NA1000:: <i>ydeH</i> ::CMS12<br><i>ΔdgcB Δcc0857 Δcc0740</i><br><i>ΔdgcA ΔpleD Δcc0655</i><br><i>Δcc3094 Δcc0896 Δcc0091</i><br><i>ΔpdeA Δcc3148</i>   | marker CMS12 tranfered in <i>rcdG<sup>0</sup>::ydeH</i> by general transduction using $\phi$ CR30, the strain optained a wild-type <i>cc1086</i> allele | this study            |
| SoA1644 | NA1000::CMS37                                                                                                                                          | NA1000 containing a kanamycin resistance marker (CMS37) integrated via plasmid pLW124 linked to <i>pdeA</i>                                             | (West et al., 2002)   |
| SoA1645 | <i>rcdG<sup>0</sup>::ydeH</i> ::CMS37                                                                                                                  | marker CMS37 tranfered in <i>rcdG<sup>0</sup>::ydeH</i> by general transduction using $\phi$ CR30, the strain retained the <i>pdeA</i> deletion         | this study            |
| SoA1646 | NA1000:: <i>ydeH</i> ::CMS37<br><i>ΔdgcB Δcc0857 Δcc0740</i><br><i>ΔdgcA ΔpleD Δcc0655</i><br><i>Δcc3094 Δcc0896 Δcc1086</i><br><i>Δcc0091 Δcc3148</i> | marker CMS37 tranfered in <i>rcdG<sup>0</sup>::ydeH</i> by general transduction using $\phi$ CR30, the strain optained a wild-type <i>pdeA</i> allele   | this study            |
| SoA1648 | <i>rcdG<sup>0</sup></i> pBV-PA5295                                                                                                                     | <i>rcdG<sup>0</sup></i> containing pBV-PA5295                                                                                                           | this study            |
| SoA1650 | <i>rcdG<sup>0</sup>::ydeH</i> pBV-PA5295                                                                                                               | <i>rcdG<sup>0</sup>::ydeH</i> containing pBV-PA5295                                                                                                     | this study            |
| SoA1652 | <i>rcdG<sup>0</sup>::pleD</i> pBV-PA5295                                                                                                               | <i>rcdG<sup>0</sup>::pleD</i> containing pBV-PA5295                                                                                                     | this study            |
| UJ2827  | NA1000 <i>ΔpopA</i>                                                                                                                                    | markerless in frame deletion of <i>popA</i> in NA1000 by allelic exchange using plasmid pAD8                                                            | (Duerig et al., 2009) |
| UJ3252  | NA1000 <i>ΔpilA</i>                                                                                                                                    | deletion of <i>pilA</i> in NA1000                                                                                                                       | Assaf Levi            |
| UJ3257  | CB15 <i>ΔflgH</i>                                                                                                                                      | markerless in frame deletion of <i>flgH</i> in CB15 by allelic exchange using plasmid pAL2                                                              | Assaf Levi            |
| UJ4449  | NA1000 <i>ΔdgcB</i>                                                                                                                                    | markerless in frame deletion of <i>dgcB</i> in NA1000 by allelic exchange using plasmid pAD7                                                            | (Abel et al., 2012)   |
| UJ4450  | NA1000 <i>ΔpleD</i>                                                                                                                                    | markerless in frame deletion of <i>pleD</i> in NA1000 by allelic exchange using plasmid pSA95                                                           | (Abel et al., 2012)   |
| UJ4454  | NA1000 <i>ΔpdeA</i>                                                                                                                                    | markerless in frame deletion of <i>pdeA</i> in NA1000 by allelic exchange using plasmid pSA81                                                           | (Abel et al., 2012)   |
| UJ4462  | CB15 <i>ΔdgcB</i>                                                                                                                                      | markerless in frame deletion of <i>dgcB</i> in CB15 by allelic exchange using plasmid pAD7                                                              | (Abel et al., 2012)   |
| UJ4463  | CB15 <i>ΔpleD</i>                                                                                                                                      | markerless in frame deletion of <i>pleD</i> in CB15 by allelic exchange using plasmid pSA95                                                             | (Abel et al., 2012)   |
| UJ4467  | CB15 <i>ΔpdeA</i>                                                                                                                                      | markerless in frame deletion of <i>pdeA</i> in CB15 by allelic exchange using plasmid pSA81                                                             | (Abel et al., 2012)   |
| UJ4618  | CB15 <i>ΔdgcB Δcc0857</i>                                                                                                                              | markerless in frame deletion of <i>cc0857</i> in CB15 <i>ΔdgcB</i> by allelic exchange using plasmid pSA91                                              | this study            |
| UJ4760  | CB15 <i>ΔdgcB Δcc0857</i><br><i>Δcc0740</i>                                                                                                            | markerless in frame deletion of <i>cc0740</i> in CB15 <i>ΔdgcB Δcc0857</i> by allelic exchange using plasmid pAD2                                       | this study            |
| UJ4773  | CB15 <i>ΔdgcB Δcc0857</i><br><i>Δcc0740 ΔdgcA</i>                                                                                                      | markerless in frame deletion of <i>dgcA</i> in CB15 <i>ΔdgcB Δcc0857 Δcc0740</i> by allelic exchange using plasmid pSA80                                | this study            |
| UJ4774  | CB15 pBV-MCS4                                                                                                                                          | CB15 containing pBV-MCS4                                                                                                                                | this study            |
| UJ4776  | CB15 pBV-PA5295 <sub>E328A</sub>                                                                                                                       | CB15 containing pBV-PA5295 <sub>E328A</sub>                                                                                                             | this study            |

|        |                                                                                                                               |                                                                                                                                                                                                                                                            |            |
|--------|-------------------------------------------------------------------------------------------------------------------------------|------------------------------------------------------------------------------------------------------------------------------------------------------------------------------------------------------------------------------------------------------------|------------|
| UJ4778 | CB15 pBV-PA5295                                                                                                               | CB15 containing pBV-PA5295                                                                                                                                                                                                                                 | this study |
| UJ4811 | CB15 $\Delta cc0740 \Delta cc0857 \Delta cc1850 \Delta cc3285$ pAD5                                                           | CB15 $\Delta cc0740 \Delta cc0857 \Delta cc1850 \Delta cc3285$ containing pAD5                                                                                                                                                                             | this study |
| UJ4816 | CB15 $\Delta dgcb \Delta cc0857 \Delta cc0740 \Delta dgca \Delta pleD$                                                        | markerless in frame deletion of <i>pleD</i> in CB15 $\Delta dgcb \Delta cc0857 \Delta cc0740 \Delta dgca$ by allelic exchange using plasmid pSA95                                                                                                          | this study |
| UJ4849 | CB15 $\Delta cc0740 \Delta cc0857 \Delta cc1850 \Delta cc2462 \Delta cc3285$ pAD5                                             | CB15 $\Delta cc0740 \Delta cc0857 \Delta cc1850 \Delta cc2462 \Delta cc3285$ containing pAD5                                                                                                                                                               | this study |
| UJ4929 | CB15 $\Delta dgcb \Delta cc0857 \Delta cc0740 \Delta dgca \Delta pleD \Delta cc0655$                                          | markerless in frame deletion of <i>cc0655</i> in CB15 $\Delta dgcb \Delta cc0857 \Delta cc0740 \Delta dgca \Delta pleD$ by allelic exchange using plasmid pSA93                                                                                            | this study |
| UJ4932 | CB15 pAD5                                                                                                                     | CB15 containing pAD5                                                                                                                                                                                                                                       | this study |
| UJ5061 | CB15 $\Delta dgcb \Delta cc0857 \Delta cc0740 \Delta dgca \Delta pleD \Delta cc0655 \Delta cc3094$                            | markerless in frame deletion of <i>cc3094</i> in CB15 $\Delta dgcb \Delta cc0857 \Delta cc0740 \Delta dgca \Delta pleD \Delta cc0655$ by allelic exchange using plasmid pSA96                                                                              | this study |
| UJ5065 | NA1000 $\Delta dgcb \Delta cc0857 \Delta cc0740 \Delta dgca \Delta pleD \Delta cc0655 \Delta cc3094 \Delta cc0896$            | markerless in frame deletion of <i>pleD</i> in NA1000 $\Delta dgcb \Delta cc0857 \Delta cc0740 \Delta dgca \Delta cc0655 \Delta cc3094 \Delta cc0896$ by allelic exchange using plasmid pSA95; referred to as cdG <sup>0</sup> strain in NA1000 background | this study |
| UJ5100 | CB15 $\Delta dgcb \Delta cc0857 \Delta cc0740 \Delta dgca \Delta pleD \Delta cc0655 \Delta cc3094 \Delta cc0896$              | markerless in frame deletion of <i>cc0896</i> in CB15 $\Delta dgcb \Delta cc0857 \Delta cc0740 \Delta dgca \Delta pleD \Delta cc0655 \Delta cc3094$ by allelic exchange using plasmid pSA102; referred to as cdG <sup>0</sup> strain in CB15 background    | this study |
| UJ5153 | CB15 $\Delta cc0655 \Delta cc0740 \Delta cc0857 \Delta cc0896 \Delta cc1850 \Delta cc2462 \Delta cc3094 \Delta cc3285$ pAD5   | CB15 $\Delta cc0655 \Delta cc0740 \Delta cc0857 \Delta cc0896 \Delta cc1850 \Delta cc2462 \Delta cc3094 \Delta cc3285$ containing pAD5                                                                                                                     | this study |
| UJ5154 | CB15 $\Delta cc0655 \Delta cc0740 \Delta cc0857 \Delta cc1850 \Delta cc2462 \Delta cc3285$ pAD5                               | CB15 $\Delta cc0655 \Delta cc0740 \Delta cc0857 \Delta cc1850 \Delta cc2462 \Delta cc3285$ containing pAD5                                                                                                                                                 | this study |
| UJ5155 | CB15 $\Delta cc0655 \Delta cc0740 \Delta cc0857 \Delta cc1850 \Delta cc2462 \Delta cc3094 \Delta cc3285$ pAD5                 | CB15 $\Delta cc0655 \Delta cc0740 \Delta cc0857 \Delta cc1850 \Delta cc2462 \Delta cc3094 \Delta cc3285$ containing pAD5                                                                                                                                   | this study |
| UJ5170 | NA1000 pTB4                                                                                                                   | NA1000 containing pTB4                                                                                                                                                                                                                                     | this study |
| UJ5172 | NA1000 cdG <sup>0</sup> pTB4                                                                                                  | the c-di-GMP free strain in NA1000 background containing pTB4                                                                                                                                                                                              | this study |
| UJ5380 | NA1000 pCM4                                                                                                                   | NA1000 containing pCM4                                                                                                                                                                                                                                     | this study |
| UJ5381 | NA1000 $\Delta cc0655 \Delta cc0740 \Delta cc0857 \Delta cc0896 \Delta cc1850 \Delta cc2462 \Delta cc3094 \Delta cc3285$ pCM4 | NA1000 $\Delta cc0655 \Delta cc0740 \Delta cc0857 \Delta cc0896 \Delta cc1850 \Delta cc2462 \Delta cc3094 \Delta cc3285$ containing pCM4                                                                                                                   | this study |
| UJ5458 | NA1000 pOP290-2                                                                                                               | NA1000 containing pOP290-2                                                                                                                                                                                                                                 | this study |

|        |                                                                                                                                     |                                                                                                                                                                            |            |
|--------|-------------------------------------------------------------------------------------------------------------------------------------|----------------------------------------------------------------------------------------------------------------------------------------------------------------------------|------------|
| UJ5459 | NA1000 $\Delta cc0655 \Delta cc0740 \Delta cc0857 \Delta cc0896 \Delta cc1850 \Delta cc2462 \Delta cc3094 \Delta cc3285$ pOP290-2   | NA1000 $\Delta cc0655 \Delta cc0740 \Delta cc0857 \Delta cc0896 \Delta cc1850 \Delta cc2462 \Delta cc3094 \Delta cc3285$ containing pOP290-2                               | this study |
| UJ5487 | NA1000 pfljL-lacZ                                                                                                                   | NA1000 containing pfljL-lacZ                                                                                                                                               | this study |
| UJ5488 | NA1000 $\Delta cc0655 \Delta cc0740 \Delta cc0857 \Delta cc0896 \Delta cc1850 \Delta cc2462 \Delta cc3094 \Delta cc3285$ pfljL-lacZ | NA1000 $\Delta cc0655 \Delta cc0740 \Delta cc0857 \Delta cc0896 \Delta cc1850 \Delta cc2462 \Delta cc3094 \Delta cc3285$ containing pfljL-lacZ                             | this study |
| UJ7134 | CB15 $\Delta pleD$ pSA217                                                                                                           | CB15 $\Delta pleD$ containing pSA217                                                                                                                                       | this study |
| UJ7137 | CB15 cdG <sup>0</sup> pSA164                                                                                                        | the c-di-GMP free strain in CB15 background containing pSA164                                                                                                              | this study |
| UJ7138 | CB15 cdG <sup>0</sup> pSA217                                                                                                        | the c-di-GMP free strain in CB15 background containing pSA217                                                                                                              | this study |
| UJ7156 | CB15 <i>dgcB</i> <sub>E261Q</sub>                                                                                                   | CB15 with a mutation coding for the DgcB active site mutant DgcB <sub>E261Q</sub> . Created by allelic exchange using plasmid pIH99                                        | this study |
| UJ7162 | CB15 cdG <sup>0</sup> <i>dgcB</i> <sub>E261Q</sub>                                                                                  | the c-di-GMP free strain in CB15 background with a mutation coding for the DgcB active site mutant DgcB <sub>E261Q</sub> . Created by allelic exchange using plasmid pIH99 | this study |

*Escherichia coli* strains:

| Name         | Genotype                                                                                                                                                                                                                                                     | Description                                                                                       | Source or Reference     |
|--------------|--------------------------------------------------------------------------------------------------------------------------------------------------------------------------------------------------------------------------------------------------------------|---------------------------------------------------------------------------------------------------|-------------------------|
| DH5 $\alpha$ | (F-) F <sup>-</sup> <i>endA</i> 1 <i>hsdR</i> 17 (rK-mK plus) <i>glnV</i> 44 <i>thi</i> 1 <i>recA</i> 1 <i>gyr</i> $\Delta$ (Nal <sup>R</sup> ) <i>relA</i> 1 $\Delta$ ( <i>lacIZYA-argF</i> )U169 <i>deoR</i> ( $\Phi$ 80dlac $\Delta$ ( <i>lacZ</i> ) M15) | Used for general cloning purposes                                                                 | (Woodcock et al., 1989) |
| S17-1        | RP4-2, Tc::Mu, KM-Tn7                                                                                                                                                                                                                                        | Used as donor strain in conjugations to transfer oriT containing plasmids to <i>C. crescentus</i> | (Simon et al., 1983)    |

Phages:

| Name        | Description                                                                                                                                             | Source or Reference     |
|-------------|---------------------------------------------------------------------------------------------------------------------------------------------------------|-------------------------|
| $\phi$ CbK  | Bacteriophage that infects <i>C. crescentus</i> uses the pili as a receptor.                                                                            | (Schmidt et al., 1965)  |
| $\phi$ CR30 | Bacteriophage that infects <i>C. crescentus</i> uses the paracrystalline surface layer protein as a receptor; can be used for generalized transduction. | (Ely and Johnson, 1977) |

| Plasmids:                   |  |                                                                                                                                                    |                            |
|-----------------------------|--|----------------------------------------------------------------------------------------------------------------------------------------------------|----------------------------|
| Name                        |  | Description                                                                                                                                        | Source or Reference        |
| pAD2                        |  | pNPTS138; used for inframe deletion of <i>cc0740</i>                                                                                               | Anna Dürig                 |
| pAD5                        |  | pMR20; <i>popA-egfp</i> under control of <i>popA</i> promoter                                                                                      | (Duerig et al. 2009)       |
| pAD7                        |  | pNPTS138; used for inframe deletion of <i>dgcB</i>                                                                                                 | (Abel et al., 2011)        |
| pAD8                        |  | pNPTS138; used for clean deletion of <i>popA</i>                                                                                                   | (Duerig et al., 2009)      |
| pAL2                        |  | pNPTS138; used for inframe deletion of <i>flgH</i>                                                                                                 | Assaf Levi                 |
| pBV-MCS4                    |  | Gent <sup>R</sup> , vanillate inducible medium-copy number plasmid                                                                                 | (Thanbichler et al., 2007) |
| pBV-PA5295                  |  | pBV-MCS4; <i>PA5292</i> under control of the vanillate promoter                                                                                    | (Duerig et al. 2009)       |
| pBV-PA5295 <sub>E328A</sub> |  | pBV-MCS4; <i>PA5292</i> <sub>E328A</sub> active site mutant under the control of vanillate promoter                                                | (Duerig et al. 2009)       |
| pCM4                        |  | pRK-lacZ 290; <i>lacZ</i> under control of the <i>fliL</i> / <i>fliG</i> promoter                                                                  | C. Mohr                    |
| pfljL-lacZ                  |  | pRK-lacZ 290; <i>lacZ</i> under control of the <i>fliL</i> promoter                                                                                | E. Mangan                  |
| pIH99                       |  | pNPTS138; used for the introduction of <i>dgcB</i> <sub>g781c</sub> coding for DgcB <sub>E261Q</sub> by allelic exchange                           | this study                 |
| pLW124                      |  | Kan <sup>R</sup> , suicide vector pBGS18T containing a homology region to <i>C. crescentus</i> for chromosomal intergration close to <i>pdeA</i>   | (West et al., 2002)        |
| pLW132                      |  | Kan <sup>R</sup> , suicide vector pBGS18T containing a homology region to <i>C. crescentus</i> for chromosomal intergration close to <i>cc0091</i> | (West et al., 2002)        |
| pLW92                       |  | Kan <sup>R</sup> , suicide vector pBGS18T containing a homology region to <i>C. crescentus</i> for chromosomal intergration close to <i>cc1086</i> | (West et al., 2002)        |
| pMR10                       |  | RK2 based Kan <sup>R</sup> low copy number and broad host range vector with oriT                                                                   | (Roberts et al., 1996)     |
| pNPTS138                    |  | Kan <sup>R</sup> , suicide vector with <i>sacB</i> gene and oriT                                                                                   | D. Alley                   |
| pOP290-2                    |  | pRK-lacZ 290; <i>lacZ</i> under control of the <i>fliF</i> promoter                                                                                | K. Quon                    |
| pSA79                       |  | pNPTS138; used for inframe deletion of <i>cc1086</i>                                                                                               | this study                 |
| pSA80                       |  | pNPTS138; used for inframe deletion of <i>dgcA</i>                                                                                                 | this study                 |
| pSA81                       |  | pNPTS138; used for inframe deletion of <i>pdeA</i>                                                                                                 | (Abel et al., 2011)        |
| pSA90                       |  | pNPTS138; used for inframe deletion of <i>cc3148</i>                                                                                               | this study                 |
| pSA91                       |  | pNPTS138; used for inframe deletion of <i>cc0857</i>                                                                                               | this study                 |
| pSA93                       |  | pNPTS138; used for inframe deletion of <i>cc0655</i>                                                                                               | this study                 |
| pSA94                       |  | pNPTS138; used for inframe deletion of <i>tipF</i>                                                                                                 | this study                 |
| pSA95                       |  | pNPTS138; used for inframe deletion of <i>pleD</i>                                                                                                 | (Abel et al., 2011)        |
| pSA96                       |  | pNPTS138; used for inframe deletion of <i>cc3094</i>                                                                                               | this study                 |

|         |  |                                                                                                                                                                    |                     |
|---------|--|--------------------------------------------------------------------------------------------------------------------------------------------------------------------|---------------------|
| pSA102  |  | pNPTS138; used for inframe deletion of <i>cc0896</i>                                                                                                               | this study          |
| pSA129  |  | pMR10 lacking the lac Promoter                                                                                                                                     | this study          |
| pSA156  |  | pNPTS138; used for inframe deletion of <i>cc0091</i>                                                                                                               | this study          |
| pSA164  |  | pSA129; <i>pleD</i> under control of the <i>pleD</i> promoter                                                                                                      | (Abel et al., 2011) |
| pSA178  |  | pNPTS138; used for the introduction of a functional <i>hfA</i> allele by allelic exchange                                                                          | this study          |
| pSA217  |  | pSA129; <i>pleD</i> <sub>GG368DE</sub> under control of the <i>pleD</i> promoter                                                                                   | this study          |
| pSA223  |  | pNPTS138; used for the introduction of lac promoter driven <i>ydeH-3xflag</i> by allelic exchange in the intergenic region between <i>cc3065</i> and <i>cc3066</i> | this study          |
| pSA266  |  | pSRK-Km; <i>ydeH-gfp</i> under control of the lac promoter                                                                                                         | this study          |
| pSA280  |  | pSA129; <i>ydeH-3xflag</i> under control of the lac promoter                                                                                                       | this study          |
| pSRK-Km |  | Kan <sup>R</sup> , IPTG inducible pBBR based medium-copy number plasmid                                                                                            | (Khan et al., 2008) |
| pTB4    |  | pSRK-Km; <i>ydeH-3xflag</i> under control of the lac promoter                                                                                                      | this study          |
