# Supplementary material for: Bi-modal Distribution of the Second Messenger c-di-GMP Controls Cell Fate and Asymmetry during the Caulobacter Cell Cycle
Source: PubMed Central journal article supplement (PMC3764195; doi:10.1371/journal.pgen.1003744), 2013-09-05
Supplement: pgen.1003744.s013.pdf [file pgen.1003744.s013.pdf]

| Primer name | Primer sequence                                                                     | Restriction enzyme sits in 5' overhang | used for plasmid |
|-------------|-------------------------------------------------------------------------------------|----------------------------------------|------------------|
| 1733        | actagtcttctggacctcgccacgacg                                                         | SpeI                                   | pSA79            |
| 1734        | aagcttccagtaagcccgaacccttg                                                          | HindIII                                | pSA79            |
| 1735        | aagcttcgcgccggcgctcagacag                                                           | HindIII                                | pSA79            |
| 1736        | gaattcgctatgccgagggtggcg                                                            | EcoRI                                  | pSA79            |
| 1053        | aaaactagtagccgtcagctccgacac                                                         | SpeI                                   | pSA80            |
| 1054        | aaaaagcttggccttacgggggaatcg                                                         | HindIII                                | pSA80            |
| 1055        | aaaaagcttggccgcccaccatggcgccaacca                                                   | HindIII                                | pSA80            |
| 1056        | aaagaattcccgatcaggtagaagccgtcc                                                      | EcoRI                                  | pSA80            |
| 1069        | aaaaagcttggggccaggacatagtcgg                                                        | HindIII                                | pIH99            |
| 1072        | aagaattctcctgtcagcgggcgaag                                                          | EcoRI                                  | pIH99            |
| 1815        | actagtaccgacccaagatcaccag                                                           | SpeI                                   | pSA90            |
| 1816        | aagcttcgcaaccccgcctccaac                                                            | HindIII                                | pSA90            |
| 1817        | aagcttcccatgatcgtctcgtc                                                             | HindIII                                | pSA90            |
| 1818        | gctagcactcatgctgggctgtcg                                                            | NheI                                   | pSA90            |
| 1863        | actagtgttctcgtccttgccttgg                                                           | SpeI                                   | pSA91            |
| 1864        | aagcttctcgacacccttcatggtc                                                           | HindIII                                | pSA91            |
| 1865        | aagcttgacgcatcgacaccatc                                                             | HindIII                                | pSA91            |
| 1866        | gaattcggcgagctggacctggg                                                             | EcoRI                                  | pSA91            |
| 1893        | aagcttgctgtgatcttcagccactt                                                          | HindIII                                | pSA93            |
| 1894        | ctgcagagccaaggcttgagtctca                                                           | PstI                                   | pSA93            |
| 1895        | ctgcaggggtcctgaaggggttg                                                             | PstI                                   | pSA93            |
| 1896        | gctagcatgatgatgcgatcaacgac                                                          | NheI                                   | pSA93            |
| 1897        | actagtaggtcctaactcctcgtcga                                                          | SpeI                                   | pSA94            |
| 1898        | aagcttctccaagatcccttaagtc                                                           | HindIII                                | pSA94            |
| 1899        | aagcttctggtaggacgagctgct                                                            | HindIII                                | pSA94            |
| 1900        | gaattcgcttgtttgaagcgggtct                                                           | EcoRI                                  | pSA94            |
| 1905        | actagtggcgtgtctgaggacaagat                                                          | SpeI                                   | pSA96            |
| 1906        | aagcttcgagggtgaacattatacg                                                           | HindIII                                | pSA96            |
| 1907        | aagcttccctcctcaccctgtagc                                                            | HindIII                                | pSA96            |
| 1908        | gaattcctgaaaagcatcgccaagat                                                          | EcoRI                                  | pSA96            |
| 1940        | ggaattcgtggaatgaaccgagagagtagc                                                      | EcoRI                                  | pSA102           |
| 1941        | ccagacgtcaggaccgcatccatccagcaccaccacgtacatcagcg                                     | BamHI                                  | pSA102           |
| 1942        | ggatccgcggtcctgacgtctgggatggggacttctgccgagggcc                                      | BamHI                                  | pSA102           |
| 1943        | caagcttccagccaaggaccagagctatttc                                                     | HindIII                                | pSA102           |
| 2663        | ctgatcgaggtccaatacgaaccgctctccccgcggttggccgattcattaatgaagcttgttaggc<br>tggagctgcttc | HindIII                                | pSA129           |
| 2664        | aagcttggcgtaatcatggtcatagctgttctgtgtgaaattgtatccgctcacaatcatatgaatatcctcc<br>ttag   | HindIII                                | pSA129           |
| 1036        | ggatccatgatctgtcgaacggccatc                                                         | BamHI                                  | pSA156           |
| 1037        | gaattccgttcttgagggtcactcgc                                                          | EcoRI                                  | pSA156           |
| 1038        | gaattcgagcaagaccagacgttccgc                                                         | EcoRI                                  | pSA156           |
| 1039        | gctagccggctgatcgtctgatccagt                                                         | NheI                                   | pSA156           |
| 2958        | gaattcgattcgtatcgccaagagcctcaa                                                      | EcoRI                                  | pSA178           |
| 2959        | cgaattcactagtgatagggtctccagatcgggtt                                                 | EcoRI                                  | pSA178           |
| 3369        | aaaaactagtagcaattggaattccgaggaacacac                                                | SpeI                                   | pSA223           |

|      |                                                                                 |         |        |
|------|---------------------------------------------------------------------------------|---------|--------|
| 3370 | tttttcgaacaaaaaacccctcaagacccgtttagaggccccaaggggtatgctagctcttcgtccctgcctt<br>gt | BstBI   | pSA223 |
| 3371 | ttcgaaaaaacaaggctcagtcggaagactgggcctttgtttacaaggcagggacgaagag                   | BstBI   | pSA223 |
| 3372 | ttttctaaggcgaccaagtctgcaagat                                                    | AflII   | pSA223 |
| 3589 | aaaaggatcccgccgacgttgactatTTTT                                                  | BamHI   | pSA227 |
| 3590 | tttgatccgcaagattttccgtccgta                                                     | BamHI   | pSA227 |
| 3591 | aaaaagctttgatgctgctcgacctg                                                      | HindIII | pSA228 |
| 3592 | ttttaagcttctattcggcggcgcctt                                                     | HindIII | pSA228 |
| 3593 | aaaaagcttatgtctccgacgactggaag                                                   | HindIII | pSA229 |
| 3594 | ttttaagcttagcatggggtcaaaaatctc                                                  | HindIII | pSA229 |
| 3595 | aaaaagcttgatgtggcggtttcttgg                                                     | HindIII | pSA230 |
| 3596 | ttttaagcttgcgtacttctgctcgatgaa                                                  | HindIII | pSA230 |
| 3597 | aaaaagcttgcgggtggagaacacttctt                                                   | HindIII | pSA231 |
| 3598 | ttttaagcttcttgcagaagaacctctcg                                                   | HindIII | pSA231 |
| 926  | cttgaagcttttacttgtacagctcgtccat                                                 | HindIII | pSA266 |
| 1323 | catatggtgagcaagggcgag                                                           | NdeI    | pSA266 |
| 4264 | ataacaatttcacacaggaaacagcatatgatcaagaagacaacggaaat                              | NA      | pSA266 |
| 4265 | cccggtagacagctcctcgcccttgctcacaactcggttaatcacatttgg                             | NA      | pSA266 |
| 2939 | aaaagagctcataatgacacgatgcgaggaaacgcatatgatcaagaagacaacggaaat                    | SacI    | pTB4   |
| 2940 | aaaaggtaccagcagctccagcctacatta                                                  | KpnI    | pTB4   |
| 5103 | cgctacggcgccaggagttcgcatgatcttcc                                                | NA      | pIH99  |
| 5104 | ggaagatcatcggaactcctggccgccgtagcg                                               | NA      | pIH99  |
